# Supplementary material for: Association of TyG index and TG/HDL-C ratio with arterial stiffness progression in a non-normotensive population
Source: Springer Nature journal article supplement (doi:10.1186/s12933-021-01330-6), 2021-07-06

**Supplementary Table S1: Baseline characteristics by quartile groups of TyG index.**

|                                        | quartile 1<br>(n=474)        | quartile 2<br>(n=474)        | quartile 3<br>(n=477)        | quartile 4<br>(n=470)        | P value |
|----------------------------------------|------------------------------|------------------------------|------------------------------|------------------------------|---------|
| Age (year)                             | 61.04(12.64)                 | 60.86(12.82)                 | 62.44(12.36)                 | 63.28(13.05)                 | 0.008   |
| Sex (Men, %)                           | 374(78.9)                    | 384(81.0)                    | 367(76.9)                    | 352(74.9)                    | 0.129   |
| BMI                                    | 25.17(3.14)                  | 26.22(2.95)                  | 26.93(2.95)                  | 27.69(3.15)                  | <0.001  |
| Physical activity (n, %)               | 258(54.4)                    | 232(48.9)                    | 240(50.3)                    | 234(49.8)                    | 0.336   |
| Smoking status (n, %)                  |                              |                              |                              |                              |         |
| never smoking                          | 274(57.8)                    | 264(55.7)                    | 306(64.2)                    | 284(60.4)                    | 0.056   |
| current smoker                         | 114(24.1)                    | 139(29.3)                    | 109(22.9)                    | 120(25.5)                    |         |
| former smoker                          | 86(18.1)                     | 71(15.0)                     | 62(13.0)                     | 66(14.0)                     |         |
| Current drinking (n, %)                | 187(39.5)                    | 214(45.1)                    | 222(46.5)                    | 221(47.0)                    | 0.072   |
| SBP (mmHg)                             | 139.26(11.59)                | 139.46(13.51)                | 138.75(12.59)                | 140.71(12.90)                | 0.105   |
| DBP (mmHg)                             | 76.08(9.81)                  | 76.80(9.13)                  | 79.47(9.78)                  | 82.49(10.07)                 | <0.001  |
| MAP (mmHg)                             | 97.14(8.02)                  | 97.69(7.90)                  | 99.23(8.36)                  | 101.89(9.13)                 | <0.001  |
| Hypertension (n, %)                    | 261(55.1)                    | 252(53.2)                    | 236(49.5)                    | 264(56.2)                    | 0.176   |
| Antihypertensive medication (n, %)     | 89(18.8)                     | 78(16.5)                     | 58(12.2)                     | 42(8.9)                      | <0.001  |
| Diabetes (n, %)                        | 36(7.6)                      | 51(10.8)                     | 83(17.4)                     | 153(32.6)                    | <0.001  |
| Dyslipidemia (n, %)                    | 59(12.4)                     | 113(23.8)                    | 178(37.3)                    | 423(90.0)                    | <0.001  |
| FBG (mmol/L)                           | 5.22(0.63)                   | 5.47(0.79)                   | 5.77(1.19)                   | 6.72(2.25)                   | <0.001  |
| PBG (mmol/L)                           | 7.01(2.01)                   | 7.22(1.98)                   | 7.67(2.48)                   | 8.88(3.45)                   | <0.001  |
| HbA1c (%)                              | 5.73(0.47)                   | 5.85(0.57)                   | 5.91(0.73)                   | 6.28(1.25)                   | <0.001  |
| Triglyceride (mmol/L)                  | 0.83(0.17)                   | 1.27(0.20)                   | 1.79(0.33)                   | 3.56(2.47)                   | <0.001  |
| Total cholesterol (mmol/L)             | 4.36(0.84)                   | 4.74(0.93)                   | 4.90(0.91)                   | 5.23(1.04)                   | <0.001  |
| LDL-C (mmol/L)                         | 2.73(0.76)                   | 3.17(0.86)                   | 3.29(0.81)                   | 3.25(0.95)                   | <0.001  |
| HDL-C (mmol/L)                         | 1.45(0.38)                   | 1.29(0.27)                   | 1.19(0.24)                   | 1.07(0.24)                   | <0.001  |
| eGFR (mL/min per 1.73 m <sup>2</sup> ) | 92.17(28.15)                 | 89.97(25.57)                 | 91.85(25.36)                 | 89.50(24.96)                 | 0.294   |
| Uric acid (μmol/L)                     | 330.54(75.92)                | 361.84(78.19)                | 368.80(81.84)                | 402.43(86.87)                | <0.001  |
| Homocysteine (μmol/L)                  | 12.59(7.32)                  | 12.35(7.46)                  | 13.07(8.40)                  | 12.78(7.48)                  | 0.518   |
| TyG index                              | 0.78[0.59,0.93]              | 1.22[1.13,1.32]              | 1.61[1.51,1.70]              | 2.20[1.98,2.47]              | <0.001  |
| TG/HDL-C ratio                         | 0.58[0.45,0.76]              | 0.98[0.82,1.22]              | 1.55[1.23,1.84]              | 2.87[2.15,3.88]              | <0.001  |
| baPWV (cm/s)                           | 1501.00[1385.2<br>5,1720.50] | 1526.00[1388.0<br>0,1723.00] | 1541.50[1400.2<br>5,1775.00] | 1592.50[1406.5<br>0,1844.50] | 0.001   |

Data are the mean(SD), median[IQR] or number (%).

BMI, body mass index; SBP, systolic blood pressure; DBP, diastolic blood pressure; MAP, mean arterial pressure; FBG, fasting blood glucose; PBG, postprandial blood glucose; HbA1c: glycated hemoglobin; HDL-C, high-density lipoprotein cholesterol; LDL-C, low-density lipoprotein cholesterol; eGFR, estimated glomerular filtration rate; TyG, triglyceride glucose; baPWV, brachial-ankle pulse wave velocity.

**Supplementary Table S2: Baseline characteristics by quartiles of TG/HDL-C ratio.**

|                                        | quartile 1<br>(n=475)        | quartile 2<br>(n=466)        | quartile 3<br>(n=483)        | quartile 4<br>(n=471)        | P value |
|----------------------------------------|------------------------------|------------------------------|------------------------------|------------------------------|---------|
| Age (year)                             | 60.48(12.48)                 | 61.06(12.79)                 | 62.32(12.70)                 | 63.74(12.82)                 | <0.001  |
| Sex (Men, %)                           | 383(80.6)                    | 352(75.5)                    | 389(80.5)                    | 353(74.9)                    | 0.048   |
| BMI                                    | 25.15(3.16)                  | 26.30(2.95)                  | 26.70(3.07)                  | 27.85(2.96)                  | <0.001  |
| Physical activity (n, %)               | 256(53.9)                    | 243(52.1)                    | 237(49.1)                    | 228(48.4)                    | 0.282   |
| Smoking status (n, %)                  |                              |                              |                              |                              |         |
| never smoking                          | 274(57.7)                    | 272(58.4)                    | 297(61.5)                    | 285(60.5)                    | 0.128   |
| current smoker                         | 110(23.2)                    | 129(27.7)                    | 121(25.1)                    | 122(25.9)                    |         |
| former smoker                          | 91(19.2)                     | 65(13.9)                     | 65(13.5)                     | 64(13.6)                     |         |
| Current drinking (n, %)                | 188(39.6)                    | 212(45.5)                    | 211(43.7)                    | 233(49.5)                    | 0.021   |
| SBP (mmHg)                             | 139.91(12.08)                | 139.11(13.03)                | 139.16(12.69)                | 139.99(12.91)                | 0.582   |
| DBP (mmHg)                             | 75.41(9.56)                  | 77.21(9.57)                  | 79.45(9.69)                  | 82.73(9.77)                  | <0.001  |
| MAP (mmHg)                             | 96.91(8.06)                  | 97.84(8.03)                  | 99.35(8.11)                  | 101.82(9.20)                 | <0.001  |
| Hypertension (n, %)                    | 265(55.8)                    | 246(52.8)                    | 248(51.3)                    | 254(53.9)                    | 0.566   |
| Antihypertensive medication (n, %)     | 89(18.7)                     | 74(15.9)                     | 63(13.0)                     | 41(8.7)                      | <0.001  |
| Diabetes (n, %)                        | 65(13.7)                     | 67(14.4)                     | 88(18.2)                     | 103(21.9)                    | 0.002   |
| Dyslipidemia (n, %)                    | 27(5.7)                      | 99(21.2)                     | 201(41.6)                    | 446(94.7)                    | <0.001  |
| FBG (mmol/L)                           | 5.57(1.22)                   | 5.62(1.33)                   | 5.78(1.24)                   | 6.19(1.94)                   | <0.001  |
| PBG (mmol/L)                           | 7.43(2.58)                   | 7.46(2.51)                   | 7.69(2.47)                   | 8.19(2.94)                   | <0.001  |
| HbA1c (%)                              | 5.88(0.70)                   | 5.92(0.84)                   | 5.92(0.73)                   | 6.05(1.03)                   | 0.01    |
| Triglyceride (mmol/L)                  | 0.84(0.20)                   | 1.27(0.24)                   | 1.77(0.35)                   | 3.56(2.45)                   | <0.001  |
| Total cholesterol (mmol/L)             | 4.48(0.87)                   | 4.78(0.98)                   | 4.81(0.94)                   | 5.16(1.01)                   | <0.001  |
| LDL-C (mmol/L)                         | 2.75(0.78)                   | 3.19(0.89)                   | 3.27(0.83)                   | 3.23(0.91)                   | <0.001  |
| HDL-C (mmol/L)                         | 1.56(0.34)                   | 1.30(0.21)                   | 1.14(0.19)                   | 1.00(0.19)                   | <0.001  |
| eGFR (mL/min per 1.73 m <sup>2</sup> ) | 94.77(29.02)                 | 88.67(25.01)                 | 91.14(24.45)                 | 88.87(25.06)                 | 0.001   |
| Uric acid (μmol/L)                     | 327.64(77.30)                | 359.39(77.72)                | 373.05(78.76)                | 403.30(86.88)                | <0.001  |
| Homocysteine (μmol/L)                  | 12.86(8.50)                  | 12.10(6.66)                  | 12.98(7.64)                  | 12.84(7.76)                  | 0.281   |
| TyG index                              | 0.80[0.59,1.00]              | 1.22[1.06,1.40]              | 1.58[1.42,1.73]              | 2.13[1.89,2.46]              | <0.001  |
| TG/HDL-C ratio                         | 0.56[0.45,0.68]              | 0.97[0.88,1.08]              | 1.54[1.37,1.72]              | 2.88[2.32,3.88]              | <0.001  |
| baPWV (cm/s)                           | 1477.00[1370.5<br>0,1655.50] | 1536.00[1390.0<br>0,1746.00] | 1537.50[1396.5<br>0,1758.00] | 1634.00[1418.0<br>0,1874.50] | <0.001  |

Data are the mean(SD), median[IQR] or number (%).

BMI, body mass index; SBP, systolic blood pressure; DBP, diastolic blood pressure; MAP, mean arterial pressure; FBG, fasting blood glucose; PBG, postprandial blood glucose; HbA1c: glycated hemoglobin; HDL-C, high-density lipoprotein cholesterol; LDL-C, low-density lipoprotein cholesterol; eGFR, estimated glomerular filtration rate; TyG, triglyceride glucose; baPWV, brachial-ankle pulse wave velocity.

**Supplementary Table S3:** The association of insulin resistance indexes and arterial stiffness progression in prehypertensive and hypertensive populations.

|                       | population   | Change (cm/s) |         | Change rate (cm/s/year) |         | Slope        |         |
|-----------------------|--------------|---------------|---------|-------------------------|---------|--------------|---------|
|                       |              | Coefficient*  | P value | Coefficient*            | P value | Coefficient* | P value |
| <b>TyG index</b>      |              |               |         |                         |         |              |         |
| quartile 1            |              |               |         |                         |         |              |         |
| quartile 2            | pre-         | 38.798        | 0.206   | -3.866                  | 0.712   | 0.516        | 0.959   |
| quartile 3            | hypertension | 53.848        | 0.102   | -4.630                  | 0.680   | -3.024       | 0.778   |
| quartile 4            |              | 68.463        | 0.165   | 11.519                  | 0.493   | 6.777        | 0.674   |
| quartile 1            |              |               |         |                         |         |              |         |
| quartile 2            | hypertension | 93.330        | 0.008   | 28.292                  | 0.008   | 22.311       | 0.029   |
| quartile 3            |              | 106.026       | 0.005   | 38.729                  | 0.001   | 34.650       | 0.002   |
| quartile 4            |              | 138.954       | 0.007   | 45.564                  | 0.004   | 37.632       | 0.012   |
| <b>TG/HDL-C ratio</b> |              |               |         |                         |         |              |         |
| quartile 1            |              |               |         |                         |         |              |         |
| quartile 2            | pre-         | 20.995        | 0.528   | 0.736                   | 0.948   | 2.990        | 0.783   |
| quartile 3            | hypertension | 44.158        | 0.260   | 2.178                   | 0.871   | 1.842        | 0.886   |
| quartile 4            |              | 104.200       | 0.066   | 22.751                  | 0.240   | 20.709       | 0.262   |
| quartile 1            |              |               |         |                         |         |              |         |
| quartile 2            | hypertension | 84.301        | 0.049   | 26.048                  | 0.023   | 17.299       | 0.014   |
| quartile 3            |              | 97.654        | 0.010   | 41.799                  | 0.001   | 33.803       | 0.007   |
| quartile 4            |              | 122.090       | 0.039   | 47.953                  | 0.008   | 33.675       | 0.005   |

\*adjusted for age, sex, BMI, smoking status, drinking status, physical activity, diabetes, dyslipidemia, baPWV at baseline, FBG (HDL-C if TG/HDL-C ratio analyzed), triglyceride, PBG, LDL-C, eGFR, uric acid, homocysteine, MAP at baseline and follow up, use of antidiabetic, lipid-lowering, antihypertensive medications at baseline and follow up.

**Supplementary Table S4:** Joint relationship of TyG index and TG/HDL-C ratio with the absolute change, change rate and slope of baPWV.

|                                         | Coefficient* | Se     | 95% CI         | P value |
|-----------------------------------------|--------------|--------|----------------|---------|
| <b>Change of baPWV (cm/s)</b>           |              |        |                |         |
| TyG index                               | 127.657      | 36.929 | 55.276-200.039 | 0.001   |
| TG/HDL-C ratio                          | -4.846       | 17.958 | -40.042-30.351 | 0.787   |
| <b>Change rate of baPWV (cm/s/year)</b> |              |        |                |         |
| TyG index                               | 39.392       | 11.658 | 16.541-62.243  | 0.001   |
| TG/HDL-C ratio                          | 0.104        | 5.669  | -11.007-11.216 | 0.985   |
| <b>Slope of baPWV</b>                   |              |        |                |         |
| TyG index                               | 33.607       | 11.101 | 11.849-55.366  | 0.003   |
| TG/HDL-C ratio                          | 0.413        | 5.398  | -10.167-10.993 | 0.939   |

\*adjusted for age, sex, BMI, smoking status, drinking status, physical activity, diabetes, dyslipidemia, baPWV at baseline, FBG (HDL-C if TG/HDL-C ratio analyzed), triglyceride, PBG, LDL-C, eGFR, uric acid, homocysteine, MAP at baseline and follow up, use of antidiabetic, lipid-lowering, antihypertensive medications at baseline and follow up.

**Supplementary Figure S1:** The correlation of TyG index and TG/HDL-C ratio with the cardio-metabolic risk factors.

|                                        | Spearman's coefficients |          | P value |          |
|----------------------------------------|-------------------------|----------|---------|----------|
|                                        | TyG                     | TG/HDL-C | TyG     | TG/HDL-C |
| BMI (kg/m <sup>2</sup> )               | 0.307                   | 0.314    | <0.001  | <0.001   |
| SBP (mmHg)                             | 0.015                   | -0.027   | 1.000   | 1.000    |
| DBP (mmHg)                             | 0.257                   | 0.274    | <0.001  | <0.001   |
| MAP (mmHg)                             | 0.207                   | 0.198    | <0.001  | <0.001   |
| FBG (mmol/L)                           | 0.424                   | 0.197    | <0.001  | <0.001   |
| PBG (mmol/L)                           | 0.240                   | 0.118    | <0.001  | <0.001   |
| Hb1Ac                                  | 0.157                   | 0.033    | <0.001  | 1.000    |
| TG (mmol/L)                            | 0.855                   | 0.849    | <0.001  | <0.001   |
| TC (mmol/L)                            | 0.326                   | 0.229    | <0.001  | <0.001   |
| LDLC (mmol/L)                          | 0.223                   | 0.186    | <0.001  | <0.001   |
| HDL-C (mmol/L)                         | -0.475                  | -0.718   | <0.001  | <0.001   |
| Uric acid (umol/L)                     | 0.301                   | 0.340    | <0.001  | <0.001   |
| eGFR (mL/min per 1.73 m <sup>2</sup> ) | -0.007                  | -0.056   | 1.000   | 0.757    |
| Homocysteine (μmol/L)                  | 0.023                   | 0.033    | 1.000   | 1.000    |

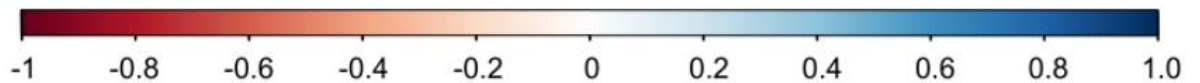

Supplement: MOESM1 [file 19336650]
